# Supplementary material
Source: MDPI journal article supplement (https://www.mdpi.com/2079-6412/12/10/1594)
Supplement: s1 [file s1]

# Supplementary Material

## Enhanced Pickering Emulsion Stabilization of Cellulose Nanocrystals and application for reinforced and hydrophobic coatings

Fan Zhang<sup>1, 2, 3,\*</sup>, Haoran Tao<sup>1, 3</sup>, Yilin Li<sup>1, 3</sup>, Yanbing Wang<sup>1,3</sup>, Yingying Zhou<sup>3, 4</sup>, Qunna Xu<sup>4</sup>, Jianzhong Ma<sup>2, 4</sup>

1. School of Textile Science and Engineering, Xi'an Polytechnic University, Xi'an 710048, Shaanxi, PR China

2. Shaanxi Collaborative Innovation Centre of Industrial Auxiliary Chemistry & Technology, Shaanxi University of Science & Technology, Xi'an 710021, Shaanxi, PR China

3. Key Laboratory of Functional Textile Material and Product (Xi'an Polytechnic University), Ministry of Education, Xi'an 710048, Shaanxi, PR China.

4. College of Bioresources Chemical and Materials Engineering, Shaanxi University of Science and Technology, Xi'an 710021, Shaanxi, PR China

\*Corresponding Author: Fan Zhang, School of Textile Science and Engineering, Xi'an Polytechnic University, Xi'an 710048, Shaanxi, PR China

Tel.: 86-029-82330365; Email: zhangfan@xpu.edu.cn

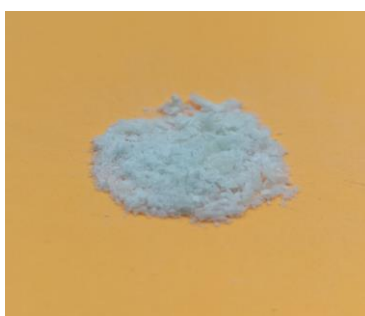

**Figure S1.** Physical appearances of BA-g-CNCs powder

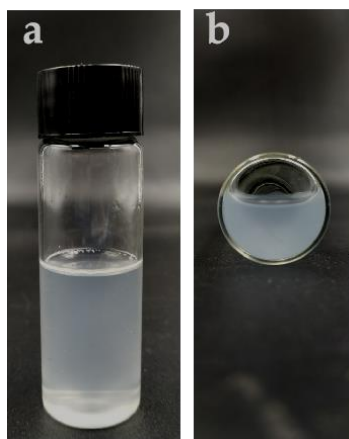

**Figure S2.** Appearance of the front (a) and bottom(b) of 0.4% (w/v) BA-g-CNCs solution with 13% of BA content.

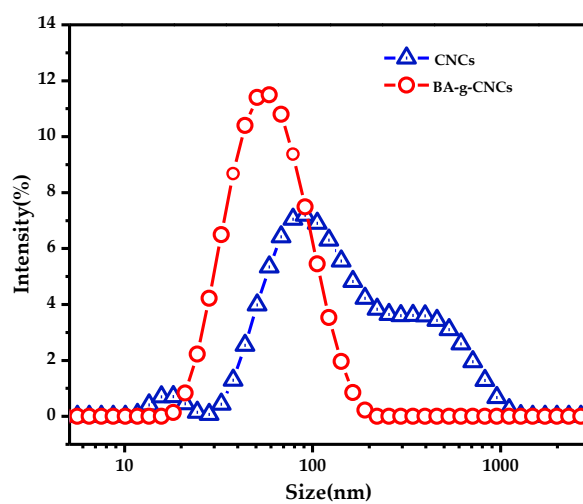

**Figure S3.** DLS of CNCs and BA-g-CNCs

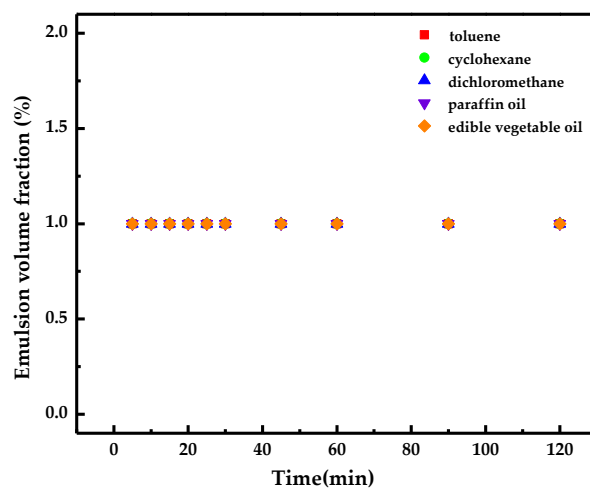

**Figure S4.** Emulsion volume fraction Pickering emulsions stabilized by BA-g-CNCs in different oil dispersion
